# Supplementary material
Source: Springer Nature journal article supplement (http://www.springermedizin.de/resource/supplementary/12887_2011_526_MOESM4_ESM.pdf/9475094)

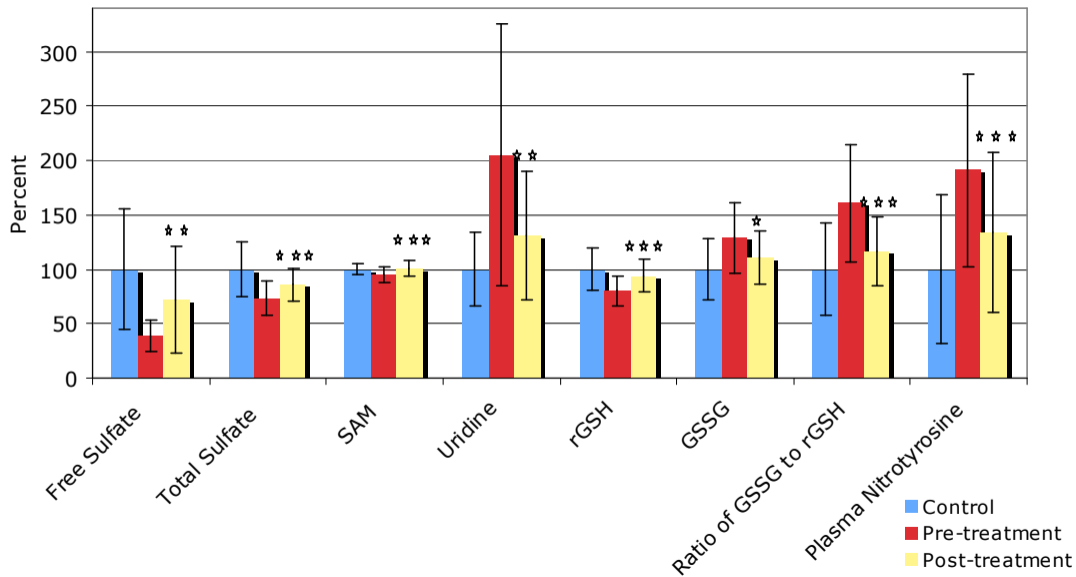

Supplement: MOESM4 [file 9475094]
